# Supplementary material
Source: ML conference proceedings conference paper supplement (https://openreview.net/forum?id=Xf02AI2uxk)
Supplement: supplementary_material [file ACMMM2024_492_SM.pdf › ACMMM2024_492_SM.pdf]

# Supplementary Materials: Visual-linguistic Cross-domain Feature Learning with Group Attention and Gamma-correct Gated Fusion for Extracting Commonsense Knowledge

Anonymous Authors

## 1 MORE EXPERIMENTAL RESULTS

### 1.1 Effects of Gamma Correction

To investigate the best choice of  $\gamma$  for the proposed Gamma-corrected Gated Fusion, additional experiments have been carried out by varying the  $\gamma$  value from 1 to 5, while keeping all the other components unchanged. The ablation results are presented in Table 1. It can be witnessed that when the  $\gamma$  value increases from 1 to 3, the results on each evaluation metric consistently show performance gains, *i.e.*, 0.93%, 0.35%, 0.18%, 1.13%, 1.90%, and 0.56% improvement on AUC, F1, P@2%, mAUC, mF1, and mP@2%, respectively. These improvements indicate that enlarging the contrast between the informative instances and less informative ones indeed helps reduce the negative effects of less informative instances. However, when the value of  $\gamma$  increases from 3 to 5, the performance starts to decrease by 3.34%, 3.27%, 3.77%, 2.61%, 2.73%, and 0.94% on AUC, F1, P@2%, mAUC, mF1, and mP@2%, respectively. This decrease in performance may be attributed to an overly large contrast that suppresses some informative instances by only highlighting the most informative ones. Considering these results,  $\gamma = 3$  is hence selected as the default value.

Table 1: Ablation study of  $\gamma$  in Gamma-corrected gated fusion.

| Value | AUC          | F1           | P@2%         | mAUC         | mF1          | mP@2%        |
|-------|--------------|--------------|--------------|--------------|--------------|--------------|
| 1     | 48.23        | 50.95        | 48.05        | 27.96        | 42.50        | 24.14        |
| 2     | 48.51        | 51.01        | 48.00        | 28.59        | 43.69        | 24.38        |
| 3     | <b>49.16</b> | <b>51.30</b> | <b>48.23</b> | <b>29.09</b> | <b>44.40</b> | <b>24.70</b> |
| 4     | 48.34        | 50.84        | 47.47        | 27.32        | 42.10        | 24.33        |
| 5     | 45.82        | 48.03        | 44.46        | 26.48        | 41.67        | 23.76        |

### 1.2 Plots of Gated Ratios

To visualize the effects of the proposed Gamma-corrected Gated Fusion, we plot the gated ratios for a bag of instances without Gamma Correction in an ascending order, and the gated ratios for the corresponding instances with Gamma Correction in Figure 1. From Figure 1, it can be observed that when Gamma correction is not applied, the gated ratios do not change significantly, and hence the negative effects of non-informative instances will significantly influence the group-level decision on the predicted entity relations. However, when Gamma correction is applied, the gated ratios vary more significantly for different instances, where the weights become smaller for less informative ones and become larger for more informative ones. As a result, the model will focus more on the informative instances and reduce the negative effects of non-informative ones. This clearly demonstrates the benefits of the proposed Gamma-corrected Gated Fusion.

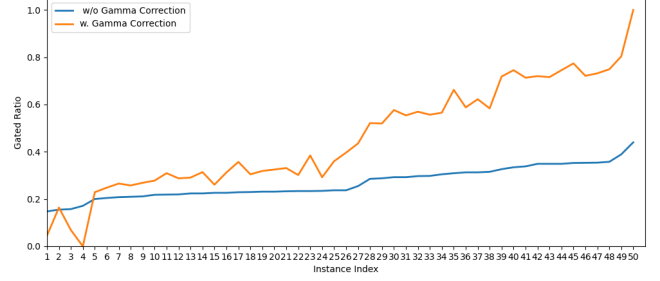

Figure 1: Plot of the gated ratios for a bag of instances with/without Gamma correction. When no Gamma correction is applied, the gated ratios for different instances do not vary significantly, while after applying Gamma correction, the gated ratios show significantly different values, where those non-informative ones have smaller values and the informative ones have larger values.

### 1.3 Per-class Comparisons to CLEVER

We have demonstrated the superiority of the proposed method over the previous best solution model, CLEVER [2] in the manuscript. We further compare the performance in precision@2% for each relation between CLEVER [2] and the proposed method, and list the top 20 relations that exhibit the most significant performance gain in Figure 2.

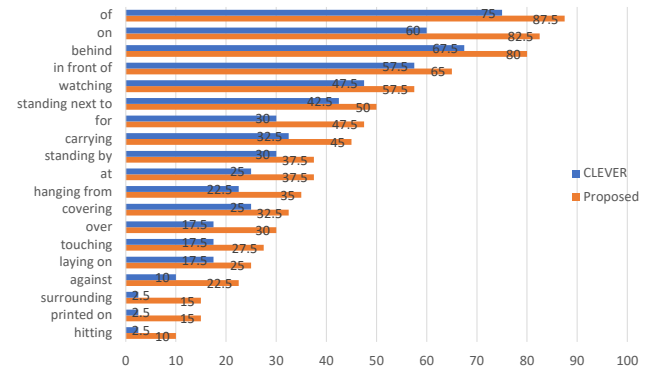

Figure 2: Compared with CLEVER [2] for the top 20 relations that exhibit the most significant performance gain in terms of precision@2%.

First of all, as observed from Figure 2, most of the performance gains are significant. The proposed method surpasses CLEVER [2] by a minimum of 10% across thirteen relation types, achieving a

notable performance gain of 22.5% and 17.5% for the relational categories ‘on’ and ‘for’, respectively. Secondly, even for some common relations such as ‘of’, ‘on’ and ‘behind’, where CLEVER already yields good prediction results, the proposed method still achieves significantly better performance. Lastly, it is indeed difficult to predict some less common relations, such as ‘printed on’ and ‘hitting’, for both methods, while the proposed method consistently outperforms CLEVER in these cases as well.

## 1.4 More Visual Comparison Results with CLEVER

We provide additional visual comparison results with CLEVER in Figure 3. Relation facts that are missed by CLEVER but accurately extracted by our method are highlighted in green, while relations that are incorrectly predicted are marked in red.

As depicted in the first three cases in Figure 3, the proposed model is capable of summarizing more precise relation triplets than CLEVER, such as (*dog*, ‘with’, *man*) in the first example, (*man*, ‘standing next to’, *cow*) in the second, and (*bottle*, ‘sitting on’, *bench*) in the third. These relational triplets, revealed in corresponding captions, demonstrate the advantages of leveraging general domain knowledge and the effectiveness of the proposed multi-modal cross-domain feature learning.

In addition, the proposed method correctly predicts relations that CLEVER [2] inaccurately extracts. As illustrated in the fourth row of Figure 3, the proposed method correctly identifies the relations between the ‘bottle’ and ‘bowl’ as ‘behind’, ‘near’ and ‘on’, while CLEVER [2] mistakenly identifies the additional relationship of ‘in’. Similar cases are evident in the last two rows, *i.e.*, CLEVER inaccurately summarizes (*bike*, ‘has’/‘on’/‘under’, *dog*) and (*woman*, ‘above’/‘on’/‘under’/‘with’, *giraffe*). The higher accuracy of the proposed model may be attributed to the proposed Group Attention module, which greatly enhances the representations of single-instance features, coupled with the Gamma-corrected Gated Fusion to mitigate the influence of noisy instances.

## 1.5 Failure Cases

In the manuscript, we conducted an analysis of failure cases and categorized them into two types. 1) The first type comprises triplets that are not labeled in the VG-CKE dataset but can be inferred from the images. 2) The second type consists of incorrectly recognized relational facts by the proposed method.

Besides the examples shown in the manuscript, we provide additional failure cases here in Figure 4, highlighting the first type of failure cases with red and underlines, while highlighting the second type of failure cases with red only. For instance, in the first case, the relational triplets (*giraffe*, ‘behind’/‘near’, ‘bird’) are reasonably summarized by the proposed method, yet not included in the ground-truth annotations. The relational facts in the benchmark are automatically created by aligning relational facts from knowledge bases to the Visual Genome dataset [1] through distant supervision, potentially resulting in missing labels. Despite these challenges, the proposed method correctly identifies these relations from images. Similar cases can be observed from rows 2 to 4 in Figure 4.

Samples of the second type of failure cases are also exemplified in Figure 4. For instance, in the last two rows, the relational facts of

‘behind’ and ‘under’ for the entity pair (*bag*, *dog*), ‘in front of’ and ‘on’ for the entity pair (*zebra*, *car*) are erroneously inferred by both the proposed model and CLEVER [2]. CLEVER [2] has identified more incorrect relations than the proposed method, as evident from the respective images.

## 2 MORE DETAILS OF VG-CKE DATASET

In this study, we adopt the large dataset developed by Yao *et al.* [2] for multi-modal commonsense knowledge extraction. As the images in this dataset are sourced from the Visual Genome dataset [1], it is denoted as VG-CKE. The VG-CKE dataset [2] focuses on the top 100 entities and relations. We list all these entities and potential relations of this benchmark in Table 2 and Table 3, respectively.

The VG-CKE dataset [2] formulates pairs of entities by selecting the subject and object from Table 2 and aligning relational facts in Table 3 to these pairs automatically through distant supervision. Some instances are mislabeled due to distant supervision [2]. The VG-CKE dataset comprises 6,443/1,964/678 pairs of entities and 13,780/3,496/1,166 associated commonsense facts for training, testing, and validation, respectively. Images are organized as image-bags for each entity pair. Ultimately, there are 55,911 images for training, 13,722 for testing, and 5,224 for validation.

## REFERENCES

- [1] Ranjay Krishna, Yuke Zhu, Oliver Groth, Justin Johnson, Kenji Hata, Joshua Kravitz, Stephanie Chen, Yannis Kalantidis, Li-Jia Li, David A Shamma, et al. 2017. Visual genome: Connecting language and vision using crowdsourced dense image annotations. *IJCV* 123 (2017), 32–73.
- [2] Yuan Yao, Tianyu Yu, Ao Zhang, Mengdi Li, Ruobing Xie, Cornelius Weber, Zhiyuan Liu, Hai-Tao Zheng, Stefan Wernter, Tat-Seng Chua, and Maosong Sun. 2023. Visually Grounded Commonsense Knowledge Acquisition. *AAAI* 37 (2023), 6583–6592.

|                                                                                     |                                                                                     |                                                                                                                                                                                                                                                                                        |
|-------------------------------------------------------------------------------------|-------------------------------------------------------------------------------------|----------------------------------------------------------------------------------------------------------------------------------------------------------------------------------------------------------------------------------------------------------------------------------------|
|    |    | Entity Pair: (dog, man)<br>CLEVER: behind, in front of, near, on<br>Proposed: behind, in front of, <b>looking at</b> , near, on, <b>with</b><br>Caption1: A man sitting on a couch with a dog<br>Caption2: A man sitting on a boat with a dog                                          |
|    |    | Entity Pair: (man, cow)<br>CLEVER: behind, holding, near, watching, with<br>Proposed: behind, holding, <b>looking at</b> , near, watching, with, <b>standing next to</b><br>Caption1: A man standing next to a group of cows<br>Caption2: A man standing next to a brown and white cow |
|    |    | Entity Pair: (bottle, bench)<br>CLEVER: above, <b>in</b> , near, on<br>Proposed: above, near, on, <b>sitting on</b> , <b>under</b><br>Caption1: A bottle of water sitting on top of a wooden bench<br>Caption2: A blue water bottle sitting on top of a wooden bench                   |
|   |   | Entity Pair: (bottle, bowl)<br>CLEVER: behind, <b>in</b> , near, on<br>Proposed: behind, near, on<br>Caption1: A table topped with a bowl of fruit and a bottle of wine<br>Caption2: A bowl of food sitting on a counter next to a bottle of wine                                      |
|  |  | Entity Pair: (bike, dog)<br>CLEVER: behind, <b>has</b> , <b>on</b> , <b>under</b> , with<br>Proposed: behind, with<br>Caption1: A brown dog standing next to a bike<br>Caption2: A little girl riding a bike with a dog                                                                |
|  |  | Entity Pair: (woman, giraffe)<br>CLEVER: <b>above</b> , near, <b>on</b> , <b>under</b> , <b>with</b><br>Proposed: near<br>Caption1: A woman holding a baby in front of a giraffe<br>Caption2: A giraffe standing next to a woman on a horse                                            |

Figure 3: Visual comparison with CLEVER on the VG-CKE dataset [2]. The proposed method accurately extracts more relational facts from the specified entity pairs. Facts that are missed by CLEVER but correctly summarized by the proposed methods are highlighted in green while the relations that are wrongly predicted are highlighted in red. Compared to CLEVER, the proposed method predicts less incorrect relation labels and more correct relation labels.



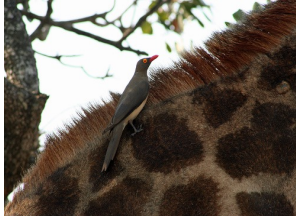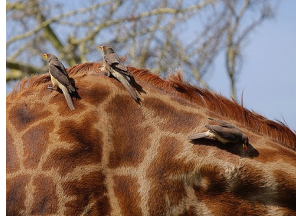

Entity Pair: (giraffe, bird)  
 CLEVER: behind, near, has, holding, with  
 Proposed: near, behind, with

Caption1: A bird perched on top of a giraffe  
 Caption2: A giraffe standing next to a bunch of birds

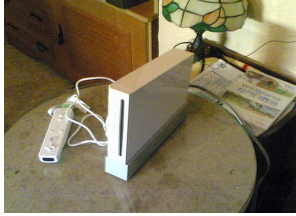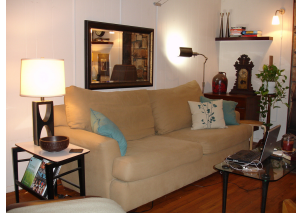

Entity Pair: (book, lamp)  
 CLEVER: behind, near  
 Proposed: behind, near

Caption1: A lamp sitting on top of a table next to a book  
 Caption2: A bookshelf filled with books and a lamp

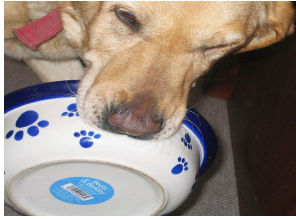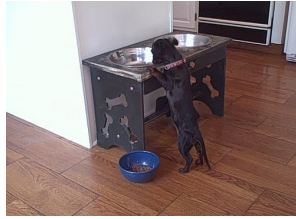

Entity Pair: (bowl, dog)  
 CLEVER: behind, in front of, near, of, on  
 Proposed: behind, for, in front of, near, on

Caption1: A dog is sniffing a bowl of food  
 Caption2: A black dog sitting next to a bowl of food

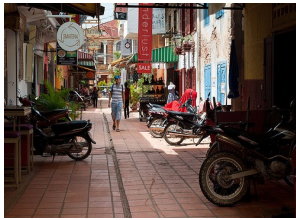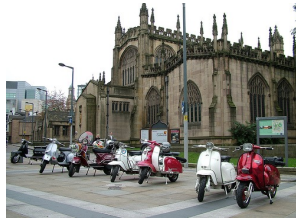

Entity Pair: (motorcycles, sidewalk)  
 CLEVER: in, near, on, sitting on  
 Proposed: at, in, near, on, parked on

Caption1: Motorcycles are parked on the sidewalk in front of a brick building  
 Caption2: Motorcycles are lined up on a sidewalk

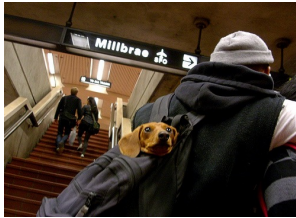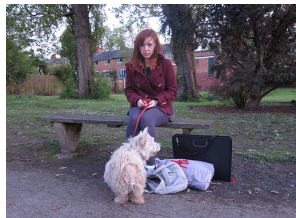

Entity Pair: (bag, dog)  
 CLEVER: behind, in front of, near, of, on, under  
 Proposed: behind, near, on, under

Caption1: A brown dog sitting on top of a luggage bag  
 Caption2: A dog laying on the ground next to a bag of luggage

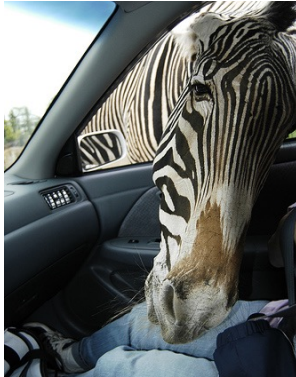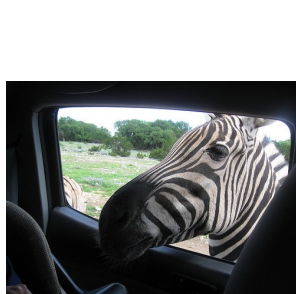

Entity Pair: (zebra, car)  
 CLEVER: behind, in front of, near, in, on  
 Proposed: in, in front of, near, on

Caption1: A zebra standing in the back seat of a car  
 Caption2: A zebra is looking out the window of a car

Figure 4: Visualization of the failure cases. The predicted relation labels mismatched with the ground truth are highlighted in red. The relations not labeled in the VG-CKE dataset [2] but reasonably identified by the proposed method or CLEVER are underlined. Compared to CLEVER, the proposed method discovers more new reasonable relations while retains the error rates.

Table 2: List of entities in the VG-CKE dataset [2].

|        |          |          |         |        |            |        |            |           |          |
|--------|----------|----------|---------|--------|------------|--------|------------|-----------|----------|
| arm    | bottle   | chair    | face    | handle | leaf       | nose   | roof       | snow      | truck    |
| bag    | bowl     | clock    | fence   | hat    | leg        | pant   | seat       | street    | trunk    |
| banana | box      | coat     | flower  | head   | letter     | paper  | sheep      | surfboard | umbrella |
| beach  | boy      | cow      | food    | helmet | light      | person | shelf      | table     | wave     |
| bench  | branch   | cup      | giraffe | hill   | logo       | pillow | shirt      | tail      | wheel    |
| bike   | building | dog      | girl    | horse  | man        | plant  | shoe       | tile      | window   |
| bird   | bus      | door     | glass   | house  | motorcycle | plate  | short      | tire      | wing     |
| board  | cabinet  | ear      | glove   | jacket | mountain   | pole   | sidewalk   | track     | wire     |
| boat   | cap      | elephant | hair    | jean   | mouth      | post   | sign       | train     | woman    |
| book   | car      | eye      | hand    | lamp   | neck       | rock   | skateboard | tree      | zebra    |

Table 3: List of relations in the VG-CKE dataset [2].

|              |              |             |              |                 |              |              |                   |             |              |
|--------------|--------------|-------------|--------------|-----------------|--------------|--------------|-------------------|-------------|--------------|
| above        | between      | driving on  | hanging from | in middle of    | near         | parked on    | shows             | standing on | walking      |
| across       | built into   | eating      | hanging in   | laying in       | next         | part of      | sitting           | supporting  | walking down |
| adorning     | carrying     | filled with | has          | laying on       | of           | playing      | sitting at        | surrounding | walking in   |
| against      | connected to | floating in | has on       | leaning on      | on           | playing with | sitting on        | swinging    | walking on   |
| along        | contains     | flying      | held by      | lining          | on back of   | printed on   | sitting on top of | throwing    | watching     |
| at           | covered in   | for         | hitting      | looking at      | on bottom of | pulling      | standing          | to          | wearing      |
| attached to  | covered with | from        | holding      | lying on        | outside      | resting on   | standing behind   | touching    | wears        |
| behind       | covering     | full of     | holding up   | lying on top of | over         | riding       | standing by       | under       | with         |
| belonging to | crossing     | growing in  | in           | made of         | painted on   | riding on    | standing near     | underneath  | worn by      |
| beneath      | cutting      | growing on  | in front of  | mounted on      | parked in    | says         | standing next to  | using       | written on   |
